# Supplementary material for: Aberrant upregulation of CaSR promotes pathological new bone formation in ankylosing spondylitis
Source: PubMed Central journal article supplement (PMC7721361; doi:10.15252/emmm.202012109), 2020-12-01
Supplement: EMMM-12-e12109-s002.pdf [file EMMM-12-e12109-s002.pdf]

## Expanded View Figures

**Figure EV1. CaSR<sup>+</sup> osteoblasts mediate pathological new bone formation of SMTS model.**

- A  $\mu$ CT images of the PCT in SMTS model. Arrowhead shows bony projection. (2D).
- B H&E and SOFG staining of Achilles tendon enthesis compartment in SMTS model. AT: Achilles tendon.
- C Quantitative analysis of area of UF.  $n = 5$ , one-way ANOVA, Bonferroni *post hoc*.
- D Quantitative analysis of area of CF.  $n = 5$ , one-way ANOVA, Bonferroni *post hoc*.
- E RT-qPCR analysis of CaSR in SMTS model.  $n = 3$ , Student's *t*-test.
- F Immunofluorescence analyses of Achilles tendon enthesis compartment in SMTS model.
- G Quantitative analysis of CaSR<sup>+</sup>, Runx2<sup>+</sup> and CaSR<sup>+</sup> Runx2<sup>+</sup> cells number and CaSR<sup>+</sup> cell percentage in Achilles tendon enthesis compartment.  $n = 5$ , one-way ANOVA, Bonferroni *post hoc*.
- H Immunofluorescence analyses of Achilles tendon enthesis compartment in SMTS model.
- I Quantitative analysis of CaSR<sup>+</sup>, OCN<sup>+</sup> and CaSR<sup>+</sup> OCN<sup>+</sup> cells number in Achilles tendon enthesis compartment.  $n = 5$ , one-way ANOVA, Bonferroni *post hoc*.
- Data information: Data shown as mean  $\pm$  SD. \* $P < 0.05$ , \*\* $P < 0.01$  compared between groups. Scale bar: 100  $\mu$ m.

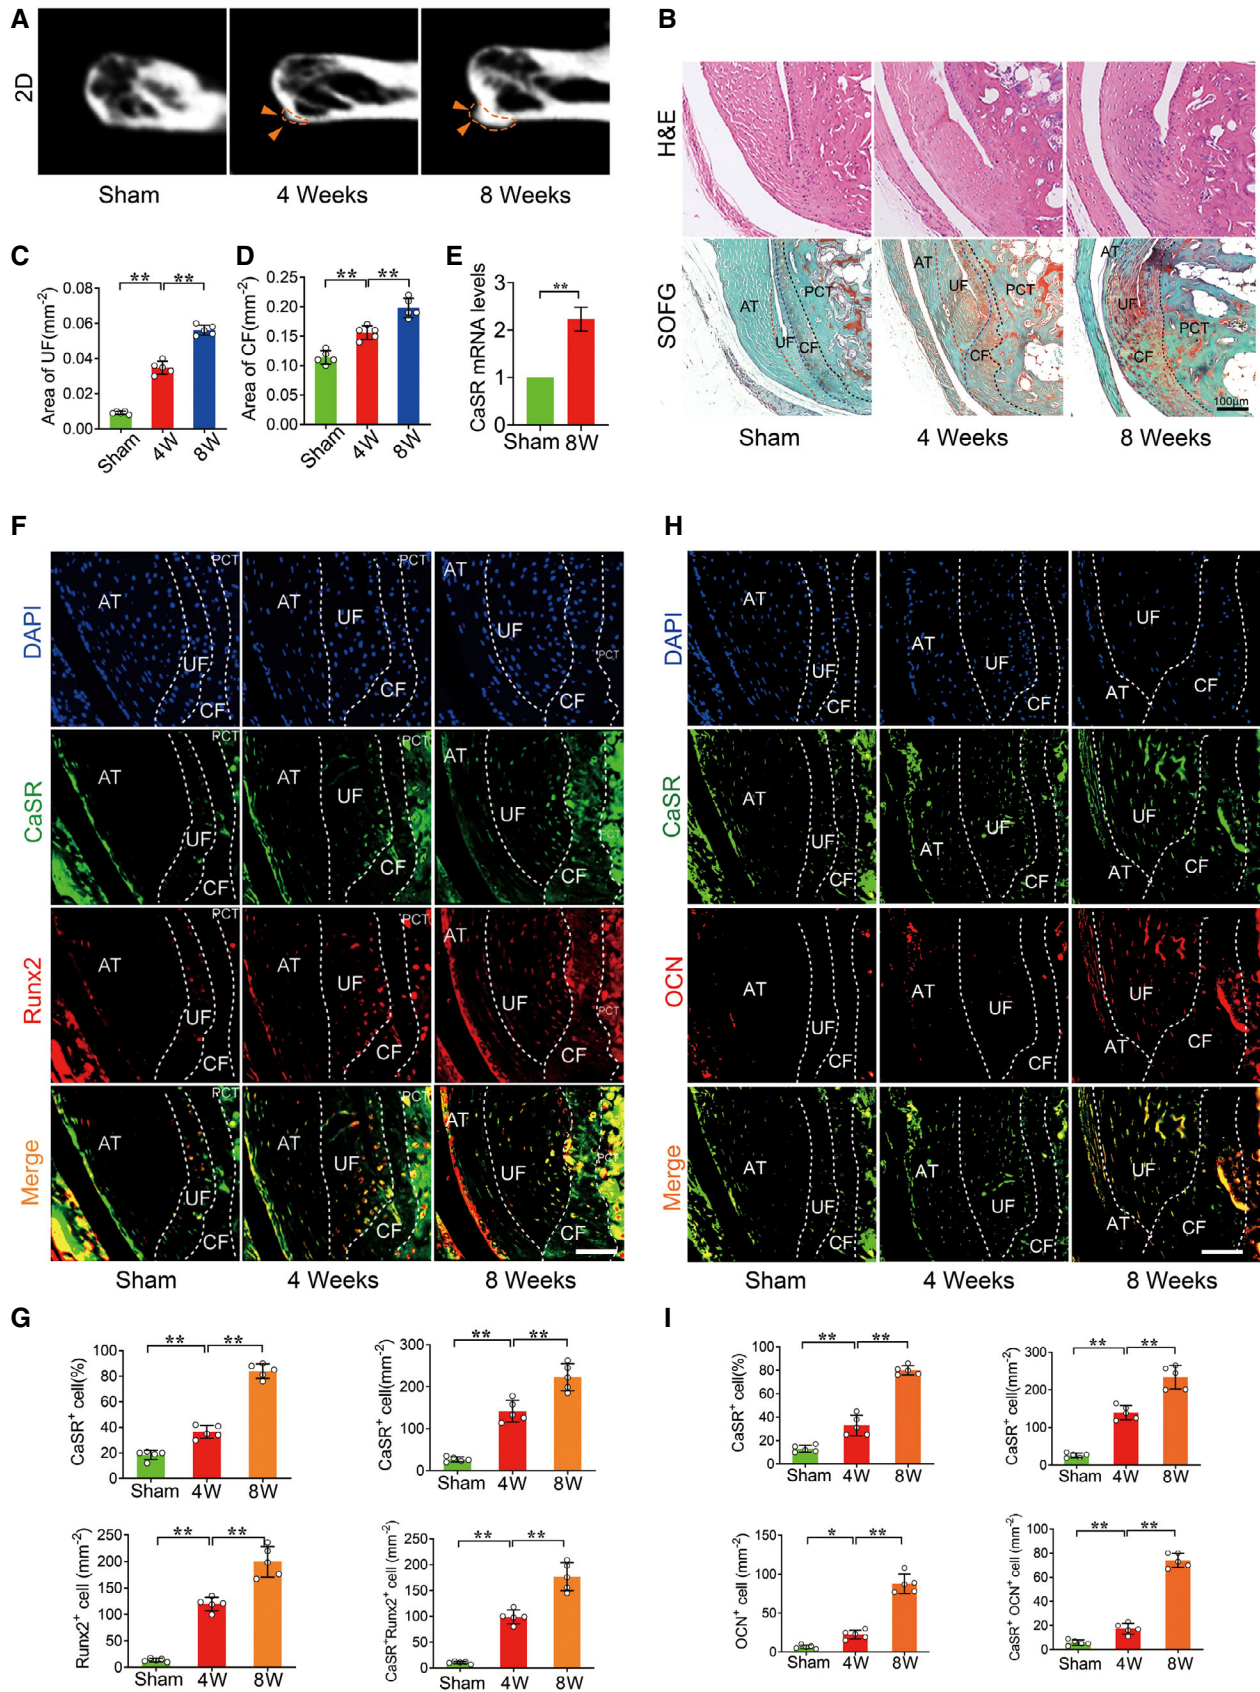

Figure EV1.

**Figure EV2. NPS-2143 suppressed pathological new bone formation might be independent of PTH.**

- A Histological score of PGIS mice.  $n = 5$  per group, Mann–Whitney  $U$ -test.
- B Clinical severity scores of arthritis for DBA/1 mice.  $n = 9$  per group. Repeated measures mixed models time  $\times$  condition.
- C Plasma PTH level in DBA/1, C57BL/6, and BALB/c mice after NPS-2143 treatment.  $n = 3$  per group.

Data information: Data shown as mean  $\pm$  SD. NS, not significant.

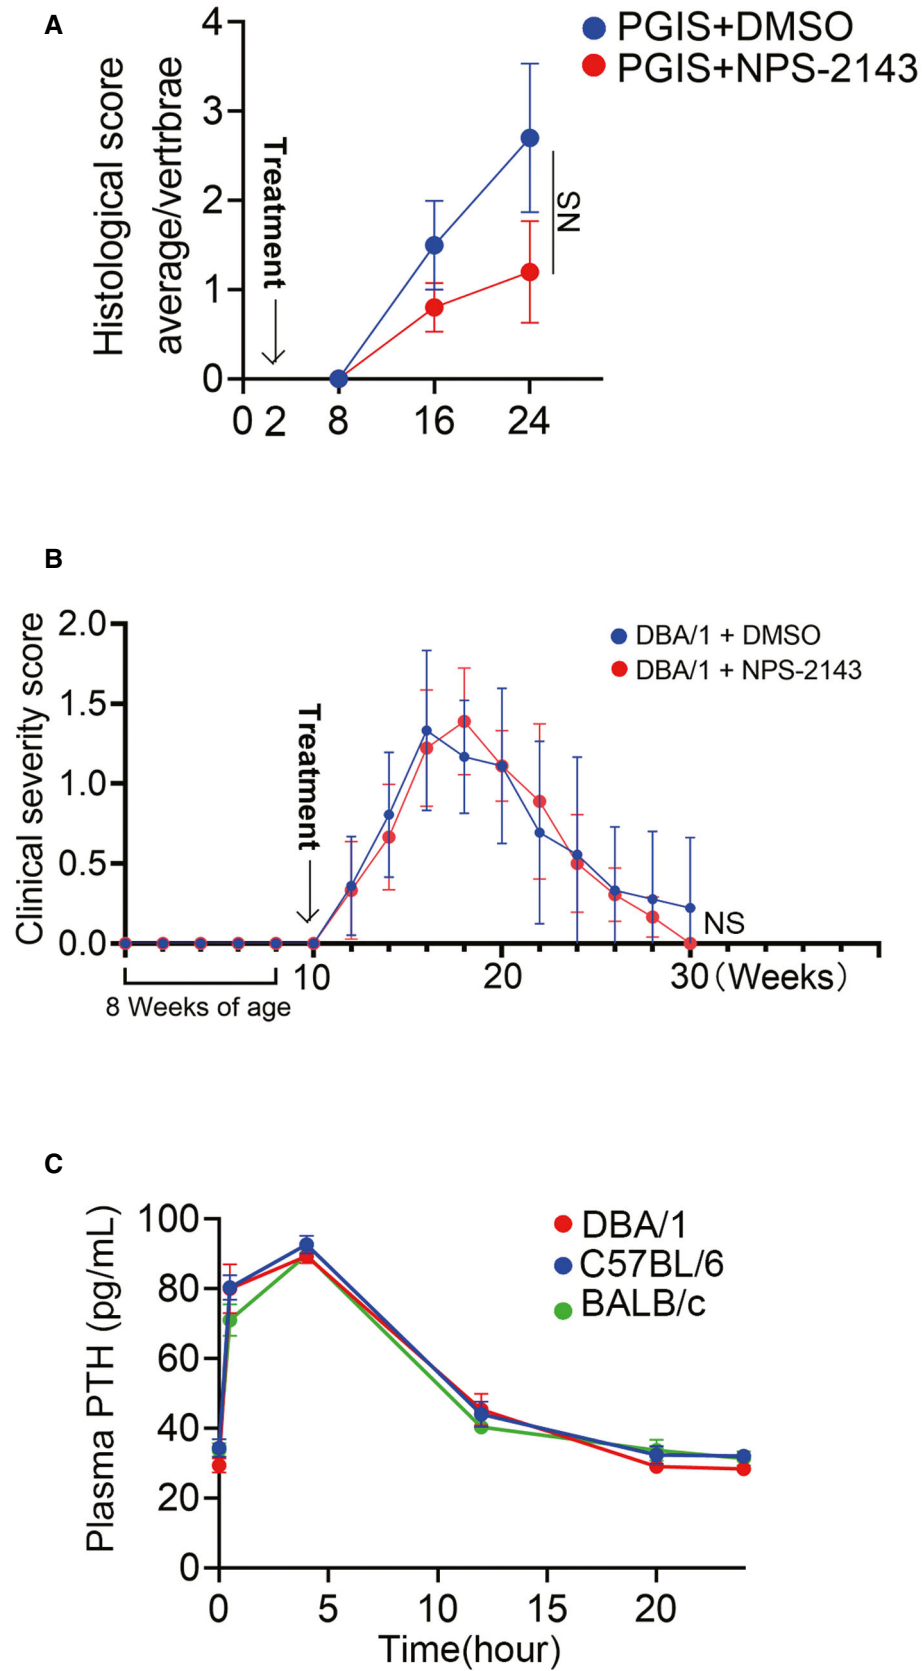

Figure EV2.

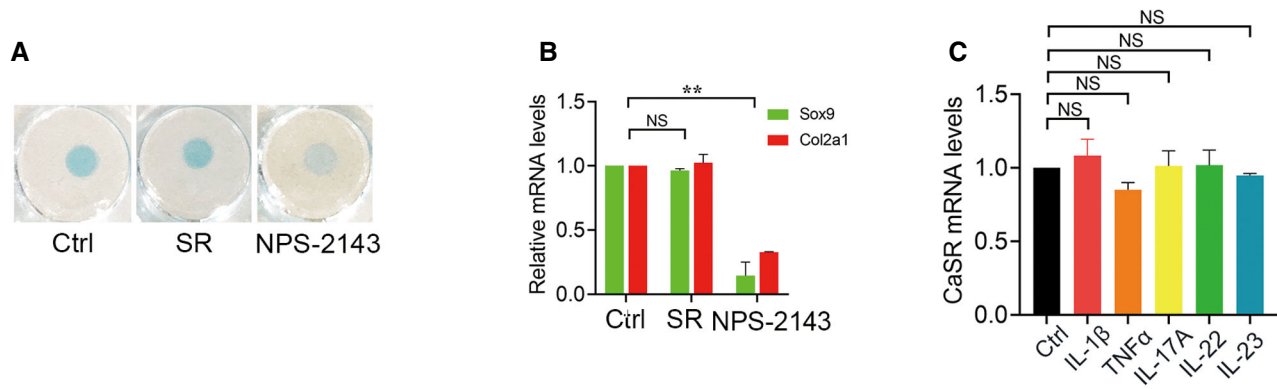

**Figure EV3. The role of CaSR in chondrocytes.**

A Alcian Blue staining of ATDC5 cells.

B RT-qPCR analysis of chondrogenic markers in ATDC5 cells.  $n = 3$ , one-way ANOVA, Bonferroni *post hoc*.

C RT-qPCR analysis of CaSR in ATDC5 cells.  $n = 3$ , one-way ANOVA, Bonferroni *post hoc*.

Data information: Data shown as mean  $\pm$  SD.  $**P < 0.01$  compared between groups, NS: not significant,  $P \geq 0.05$  compared between groups.

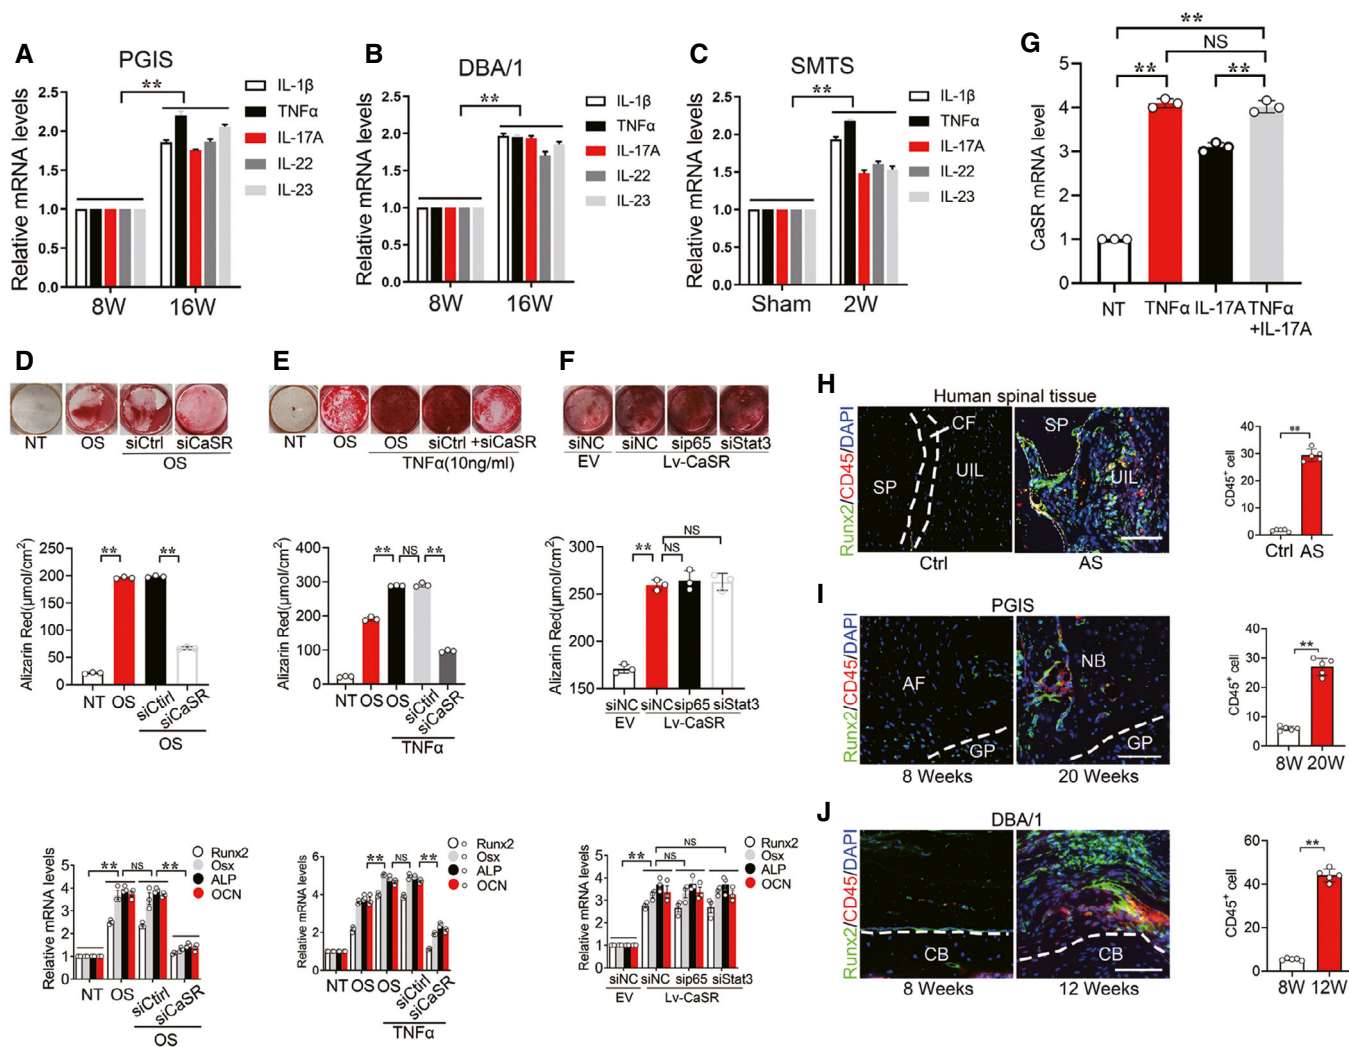

**Figure EV4. The interaction between CaSR and inflammation in pathological new bone formation.**

A–C RT–qPCR analysis of CaSR mRNA level of enthesal tissues in PGIS, DBA/1 and SMTS models.  $n = 5$ , Student's  $t$ -test.

D Alizarin Red staining of MC3T3-E1 cells. Quantification of Alizarin Red staining and RT–qPCR analysis of osteogenesis markers of MC3T3-E1 cells.  $n = 3$ , one-way ANOVA, Bonferroni *post hoc*.

E Alizarin Red staining of MC3T3-E1 cells. Quantification of Alizarin Red staining and RT–qPCR analysis of osteogenesis markers of MC3T3-E1 cells.  $n = 3$ , one-way ANOVA, Bonferroni *post hoc*.

F Alizarin Red staining of MC3T3-E1 cells. Quantification of Alizarin Red staining and RT–qPCR analysis of osteogenesis markers of MC3T3-E1 cells.  $n = 3$ , one-way ANOVA, Bonferroni *post hoc*.

G RT–qPCR analysis of mRNA level of CaSR in MC3T3-E1 cells.  $n = 3$ , one-way ANOVA, Bonferroni *post hoc*.

H Immunofluorescence analyses of CD45<sup>+</sup> and Runx2<sup>+</sup> cells at spinal enthesal site in human tissues. Quantitative analysis of CD45<sup>+</sup> cells.  $n = 5$  per group, Student's  $t$ -test.

I Immunofluorescence analyses of CD45<sup>+</sup> and Runx2<sup>+</sup> cells at spinal enthesal site in PGIS model. Quantitative analysis of CD45<sup>+</sup> cells.  $n = 5$  per group. Student's  $t$ -test.

J Immunofluorescence analyses of CD45<sup>+</sup> and Runx2<sup>+</sup> cells at ankle enthesal site in DBA/1 model. Quantitative analysis of CD45<sup>+</sup> cells.  $n = 5$  per group. Student's  $t$ -test.

Data information: Data shown as mean  $\pm$  SD. \* $P < 0.01$  or NS:  $P \geq 0.05$  compared between groups.

**Figure EV5. Functional verification of target-specific siRNAs and identification of hBMSCs.**

- A Representative CT scanning of AS patient. SP: spinous process, IL: interspinous ligament; SL: supraspinous ligament; CIL: calcified interspinous ligament; UIL: uncalcified interspinous ligament (collected tissues).
- B hBMSCs exhibited positive staining for CD90, CD105 and CD73 but were negative for CD45 and CD14.
- C–E RT–qPCR and Western blot analyses of expression of Stat3, p65 and CaSR for functional verification of target-specific siRNAs.  $n = 3$ , one-way ANOVA, Bonferroni *post hoc*.
- Data information: Data shown as mean  $\pm$  SD.  $**P < 0.01$  compare between groups. NS: not significant.

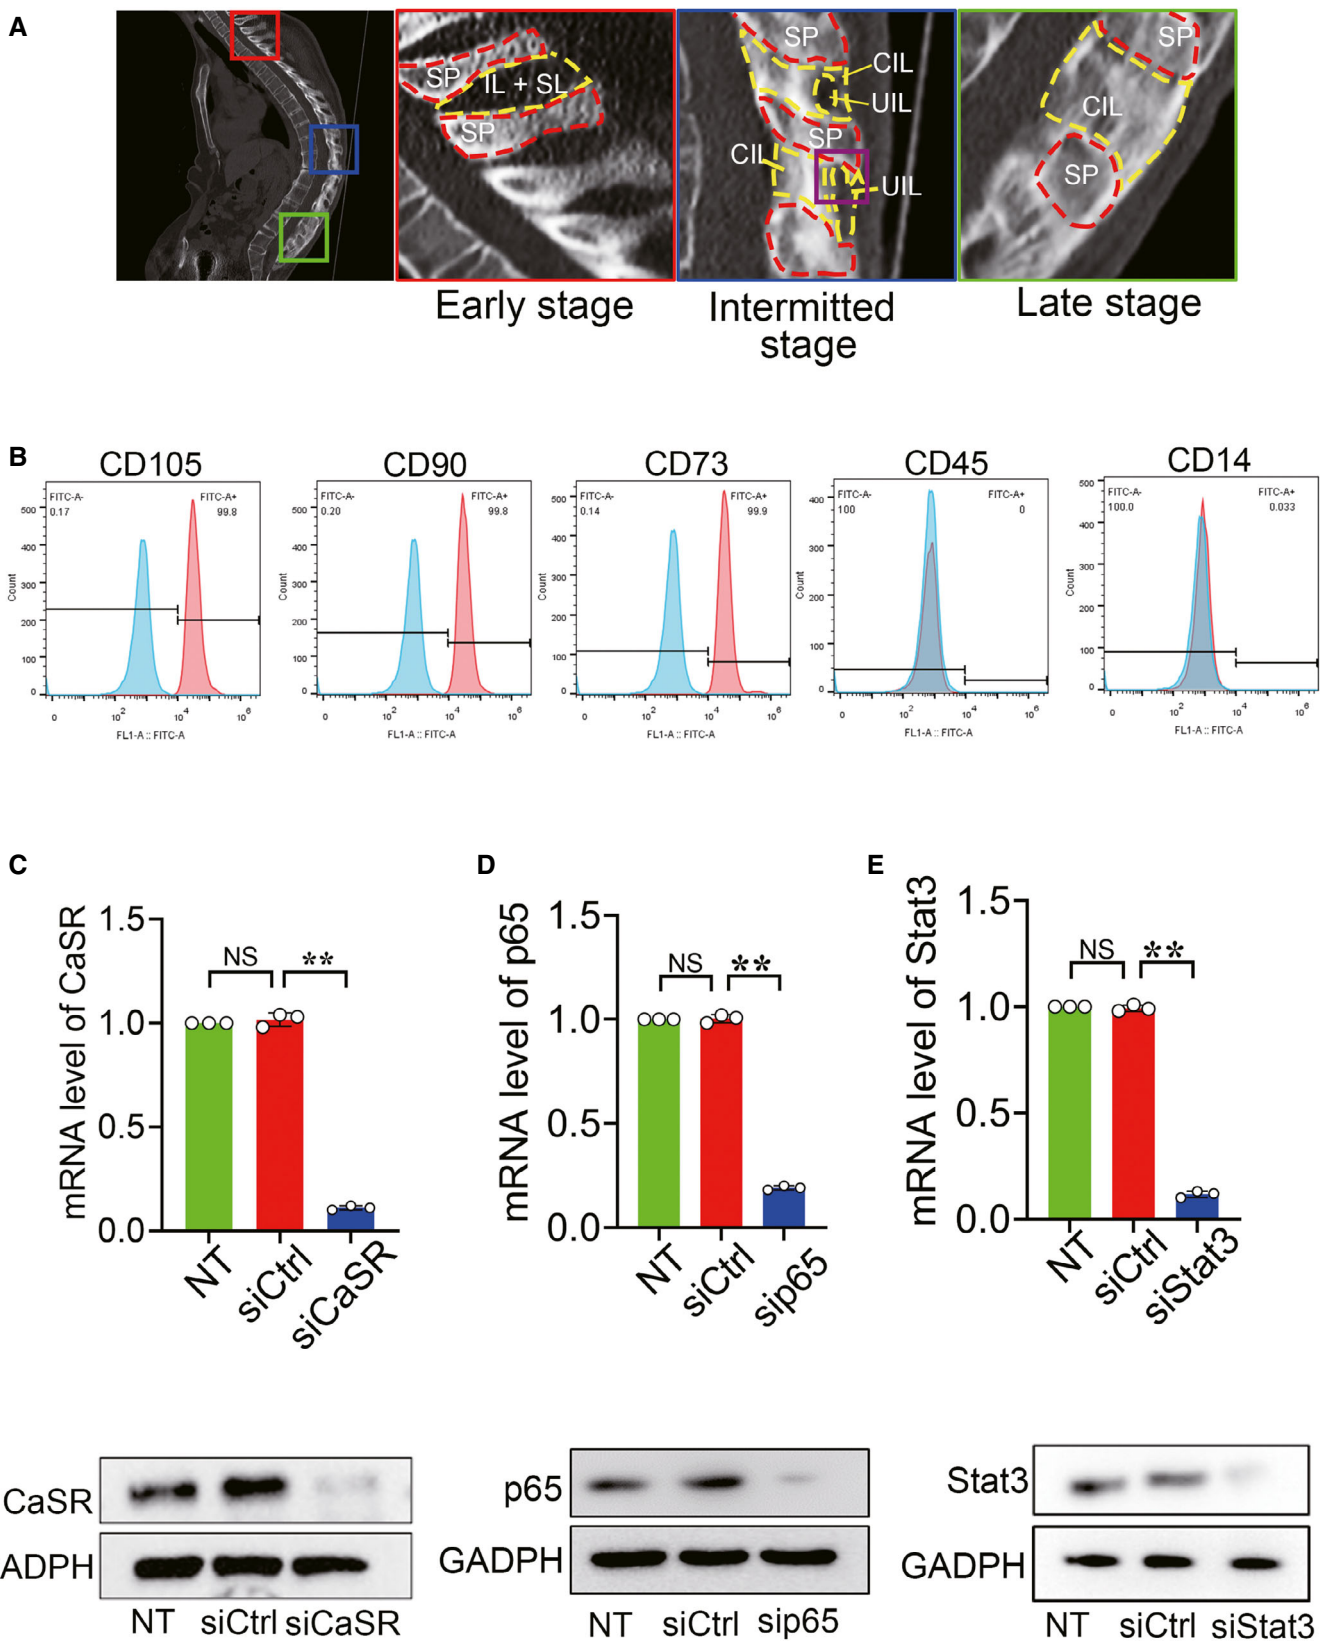

Figure EV5.
